# Supplementary material
Source: publisher figshare collection journal article supplement (https://asha.figshare.com/articles/dataset/_/21357735)
Supplement: Supplementary file 1 [file 1]

**Supplemental Material S1.** APD diagnostic test profile of the participants in the APD group.

| Participants | GDT        |            | DPT        |            | SPIN-IE    |            | DCV           |              |     | RAMST           |                     |
|--------------|------------|------------|------------|------------|------------|------------|---------------|--------------|-----|-----------------|---------------------|
| Sl No.       | Right ear  | Left ear   | Right ear  | Left ear   | Right ear  | Left ear   | SCS Right ear | SCS Left ear | DCS | Auditory memory | Auditory sequencing |
| P1           | 1SD        | <b>2SD</b> | 1SD        | <b>2SD</b> | <b>2SD</b> | <b>2SD</b> | <b>2SD</b>    | #            | 1SD | <b>2SD</b>      | 1SD                 |
| P2           | #          | #          | <b>3SD</b> | <b>3SD</b> | <b>3SD</b> | <b>2SD</b> | 1SD           | #            | #   | 1SD             | #                   |
| P3           | 1SD        | #          | #          | #          | <b>3SD</b> | <b>3SD</b> | 1SD           | 1SD          | #   | #               | #                   |
| P4           | <b>2SD</b> | #          | <b>3SD</b> | <b>3SD</b> | <b>2SD</b> | <b>2SD</b> | #             | #            | 1SD | #               | 1SD                 |
| P5           | <b>2SD</b> | <b>2SD</b> | #          | #          | <b>2SD</b> | <b>2SD</b> | #             | #            | #   | #               | #                   |
| P6           | #          | #          | <b>3SD</b> | <b>3SD</b> | <b>3SD</b> | <b>2SD</b> | <b>2SD</b>    | #            | 1SD | #               | 1SD                 |
| P7           | <b>3SD</b> | #          | <b>3SD</b> | <b>3SD</b> | <b>2SD</b> | <b>2SD</b> | <b>2SD</b>    | 1SD          | 1SD | 1SD             | 1SD                 |
| P8           | #          | #          | <b>3SD</b> | <b>3SD</b> | <b>2SD</b> | <b>2SD</b> | 1SD           | #            | #   | 1SD             | 1SD                 |
| P9           | #          | #          | <b>3SD</b> | <b>3SD</b> | <b>2SD</b> | <b>2SD</b> | 1SD           | <b>2SD</b>   | 1SD | #               | #                   |
| P10          | 1SD        | <b>2SD</b> | #          | #          | <b>3SD</b> | <b>3SD</b> | 1SD           | 1SD          | 1SD | #               | 1SD                 |

*Note.* # = scores within 1 SD from the mean; 1SD = scores >1 SD from the mean; 2SD = scores > 2 SD from the mean; 3SD = scores > 3 SD from the mean.
