# Supplementary material
Source: publisher figshare collection journal article supplement (https://asha.figshare.com/articles/dataset/_/21357735)
Supplement: Supplementary file 2 [file 1]

**Supplemental Material S4.** Mean, standard deviation, median, and statistical test (independent *t* test) results of FFR measures in noise.

| FFR Measures               | In the presence of noise |           |            |          |           |            |                 | <i>p</i> -value |
|----------------------------|--------------------------|-----------|------------|----------|-----------|------------|-----------------|-----------------|
|                            | APD                      |           |            | TD       |           |            | <i>t</i> -value |                 |
|                            | <i>M</i>                 | <i>SD</i> | <i>Mdn</i> | <i>M</i> | <i>SD</i> | <i>Mdn</i> | <i>t</i> (17)   |                 |
| P1 Amplitude (in $\mu$ V)  | 0.068                    | 0.066     | 0.060      | 0.108    | 0.066     | 0.092      | 1.320           | .204            |
| P2 Amplitude (in $\mu$ V)  | −0.071                   | 0.044     | −0.062     | −0.098   | 0.047     | −0.102     | −1.322          | .204            |
| P3 Amplitude (in $\mu$ V)  | 0.082                    | 0.093     | 0.054      | 0.119    | 0.078     | 0.095      | 0.947           | .357            |
| P4 Amplitude (in $\mu$ V)  | −0.068                   | 0.053     | −0.064     | −0.107   | 0.079     | −0.079     | −1.266          | .223            |
| P5 Amplitude (in $\mu$ V)  | 0.063                    | 0.045     | 0.049      | 0.118    | 0.046     | 0.116      | 2.622           | <b>.018</b>     |
| P6 Amplitude (in $\mu$ V)  | −0.076                   | 0.055     | −0.055     | −0.142   | 0.055     | −0.148     | −2.585          | <b>.019</b>     |
| P7 Amplitude (in $\mu$ V)  | 0.075                    | 0.045     | 0.058      | 0.106    | 0.055     | 0.106      | 1.366           | .190            |
| P8 Amplitude (in $\mu$ V)  | −0.056                   | 0.048     | −0.035     | −0.105   | 0.069     | −0.084     | −1.810          | .088            |
| P9 Amplitude (in $\mu$ V)  | 0.057                    | 0.054     | 0.036      | 0.109    | 0.093     | 0.089      | 1.513           | .149            |
| P10 Amplitude (in $\mu$ V) | −0.076                   | 0.061     | −0.048     | −0.092   | 0.058     | −0.073     | −0.595          | .560            |
| P1 Latency (in ms)         | 58.49                    | 1.45      | 58.00      | 58.77    | 1.73      | 59.00      | 0.379           | .709            |
| P2 Latency (in ms)         | 62.66                    | 1.37      | 62.50      | 61.67    | 2.03      | 61.50      | −1.262          | .224            |
| P3 Latency (in ms)         | 66.05                    | 1.59      | 66.60      | 65.74    | 3.86      | 63.70      | −0.230          | .821            |
| P4 Latency (in ms)         | 70.60                    | 2.52      | 71.50      | 70.16    | 4.07      | 68.50      | −0.290          | .776            |
| P5 Latency (in ms)         | 75.15                    | 2.91      | 75.20      | 74.66    | 4.13      | 72.50      | −0.304          | .765            |
| P6 Latency (in ms)         | 76.25                    | 2.46      | 75.35      | 77.23    | 3.91      | 77.00      | −0.296          | .771            |
| P7 Latency (in ms)         | 80.43                    | 2.67      | 79.20      | 81.06    | 3.96      | 80.00      | −0.910          | .376            |
| P8 Latency (in ms)         | 85.95                    | 2.83      | 85.00      | 85.42    | 3.51      | 85.00      | −1.335          | .200            |
| P9 Latency (in ms)         | 90.53                    | 3.57      | 90.15      | 90.67    | 4.56      | 89.00      | −1.017          | .324            |
| P10 Latency (in ms)        | 94.95                    | 3.92      | 94.95      | 94.70    | 4.47      | 94.00      | −1.242          | .231            |
| Stim-to-resp correlation   | 0.125                    | 0.049     | 0.125      | 0.273    | 0.117     | 0.290      | 3.599           | <b>.002</b>     |
| Stim-to-resp lag (in ms)   | 11.39                    | 2.26      | 10.83      | 11.65    | 1.54      | 11.35      | 1.406           | .178            |
| F0 Amplitude (in $\mu$ V)  | 0.0098                   | 0.0075    | 0.0065     | 0.0203   | 0.0093    | 0.0182     | 2.672           | <b>.016</b>     |
| F1 Amplitude (in $\mu$ V)  | 0.0024                   | 0.0014    | 0.0018     | 0.0035   | 0.0012    | 0.0036     | 1.686           | .110            |
| F2 Amplitude (in $\mu$ V)  | 0.00071                  | 0.00037   | 0.00063    | 0.00138  | 0.00059   | 0.00141    | 2.953           | <b>.009</b>     |
| Quiet to noise correlation | 0.095                    | 0.066     | 0.095      | 0.218    | 0.116     | 0.150      | 2.846           | <b>.011</b>     |

*Note.* Pearson's coefficient = *r* value mentioned for all correlation measures; stim-to-resp = stimulus-to-response; TD = typically developing children; APD = auditory processing disorder; *t*-value = *t*-statistics with degrees of freedom in parenthesis; *p* = level of significance.
