# Supplementary material
Source: publisher figshare collection journal article supplement (https://asha.figshare.com/articles/dataset/_/21357735)
Supplement: Supplementary file 3 [file 1]

## Supplemental Material S2. Results of the two-way mixed ANOVA on the FFR measures.

| FFR Measures               | Two-Way Mixed ANOVA  |             |            |                      |                  |            |                           |             |                  |
|----------------------------|----------------------|-------------|------------|----------------------|------------------|------------|---------------------------|-------------|------------------|
|                            | Main Effect of Group |             |            | Main Effect of Noise |                  |            | Noise × Group Interaction |             |                  |
|                            | <i>F</i> (1, 17)     | <i>p</i>    | $\eta_p^2$ | <i>F</i> (1, 17)     | <i>p</i>         | $\eta_p^2$ | <i>F</i> (1, 17)          | <i>p</i>    | $\eta_p^2$       |
| P1 Amplitude (in $\mu$ V)  | 0.372                | .550        | .021       | 7.642                | <b>.013</b>      | .310       | 0.849                     | .370        | .048             |
| P2 Amplitude (in $\mu$ V)  | 5.210                | .036        | .235       | 10.847               | <b>.004</b>      | .390       | 2.809                     | .112        | .142             |
| P3 Amplitude (in $\mu$ V)  | 3.880                | .065        | .186       | 8.306                | <b>.010</b>      | .328       | 3.179                     | .092        | .158             |
| P4 Amplitude (in $\mu$ V)  | 6.155                | <b>.024</b> | .266       | 10.429               | <b>.005</b>      | .380       | 4.583                     | <b>.047</b> | .212             |
| P5 Amplitude (in $\mu$ V)  | 9.443                | <b>.007</b> | .357       | 10.922               | <b>.004</b>      | .391       | 5.654                     | <b>.029</b> | .250             |
| P6 Amplitude (in $\mu$ V)  | 13.042               | <b>.002</b> | .434       | 10.495               | <b>.005</b>      | .382       | 6.093                     | <b>.024</b> | .264             |
| P7 Amplitude (in $\mu$ V)  | 12.686               | <b>.002</b> | .427       | 19.480               | <b>.0001</b>     | .534       | 11.183                    | <b>.004</b> | .397             |
| P8 Amplitude (in $\mu$ V)  | 4.761                | <b>.043</b> | .219       | 8.873                | <b>.008</b>      | .343       | 0.490                     | .493        | .028             |
| P9 Amplitude (in $\mu$ V)  | 5.116                | <b>.037</b> | .231       | 8.774                | <b>.009</b>      | .340       | 0.480                     | .498        | .027             |
| P10 Amplitude (in $\mu$ V) | 4.775                | <b>.043</b> | .219       | 4.286                | .054             | .201       | 3.905                     | .065        | .187             |
| P1 Latency (in ms)         | 0.038                | .847        | .002       | 39.033               | <b>&lt;.0001</b> | .697       | 0.060                     | .809        | .004             |
| P2 Latency (in ms)         | 0.006                | .939        | .000       | 25.935               | <b>&lt;.0001</b> | .604       | 1.853                     | .191        | .098             |
| P3 Latency (in ms)         | 0.144                | .709        | .008       | 18.630               | <b>.0004</b>     | .523       | 1.379                     | .257        | .075             |
| P4 Latency (in ms)         | 0.074                | .789        | .004       | 15.254               | <b>.001</b>      | .473       | 1.292                     | .271        | .071             |
| P5 Latency (in ms)         | 0.030                | .864        | .002       | 6.730                | <b>.019</b>      | .284       | 0.078                     | .784        | .005             |
| P6 Latency (in ms)         | 0.024                | .878        | .001       | 4.330                | .053             | .203       | 0.638                     | .435        | .036             |
| P7 Latency (in ms)         | 0.159                | .695        | .009       | 9.315                | <b>.007</b>      | .354       | 1.360                     | .260        | .074             |
| P8 Latency (in ms)         | 1.347                | .262        | .073       | 6.081                | <b>.025</b>      | .263       | 0.886                     | .360        | .050             |
| P9 Latency (in ms)         | 0.444                | .514        | .025       | 2.316                | .146             | .120       | 0.753                     | .398        | .042             |
| P10 Latency (in ms)        | 0.976                | .337        | .054       | 1.720                | .207             | .092       | 0.865                     | .365        | .048             |
| Stim-to-resp correlation   | 17.177               | <b>.001</b> | .503       | 17.874               | <b>.001</b>      | .513       | 0.415                     | .528        | .024             |
| Stim-to-resp lag (in ms)   | 0.771                | .392        | .043       | 0.005                | .946             | .0001      | 2.437                     | .137        | .125             |
| F0 Amplitude (in $\mu$ V)  | 11.719               | <b>.003</b> | .408       | 16.652               | <b>.001</b>      | .495       | 6.814                     | <b>.018</b> | .286             |
| F1 Amplitude (in $\mu$ V)  | 1.712                | .208        | .091       | 12.449               | <b>.003</b>      | .423       | 0.080                     | .781        | .005             |
| F2 Amplitude (in $\mu$ V)  | 9.300                | <b>.007</b> | .354       | 1.249                | .279             | .068       | 0.0002                    | .987        | <b>&lt;.0001</b> |

*Note.* Pearson's coefficient = *r* value mentioned for all correlation measures; stim-to-resp = stimulus-to-response; *F* value = *F*-statistics with degrees of freedom in parenthesis; *p* = level of significance;  $\eta_p^2$  = partial eta squared, the effect size.
