# Supplementary material
Source: publisher figshare collection journal article supplement (https://asha.figshare.com/articles/dataset/_/21357735)

**Supplemental Material S7.** Quiet to noise latency shift in the speech-evoked ABR for TD group and APD group.

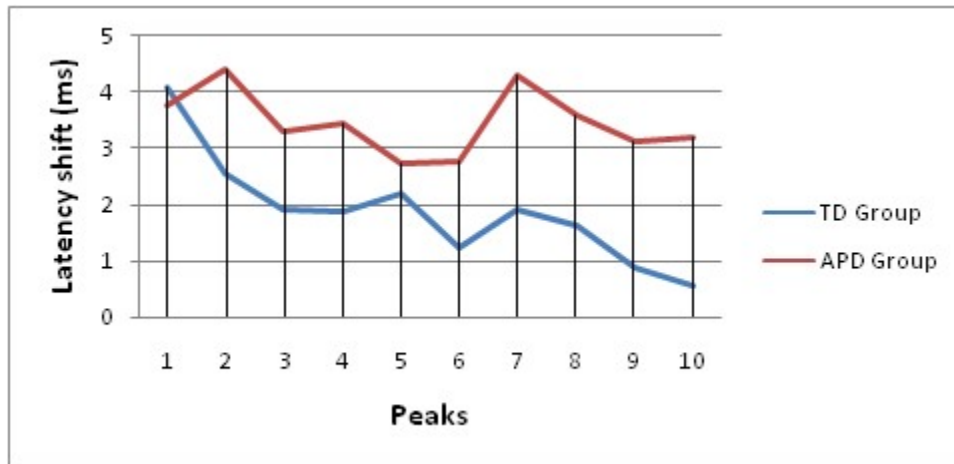

Supplement: Supplementary file 4 [file 1]
