# Supplementary material
Source: publisher figshare collection journal article supplement (https://asha.figshare.com/articles/dataset/_/21357735)
Supplement: Supplementary file 5 [file 1]

**Supplemental Material S5.** Results of the two-way mixed ANOVA on the ALLR measures.

| EP Measures                | Two-Way Mixed ANOVA  |              |            |                      |                   |            |                                  |             |            |
|----------------------------|----------------------|--------------|------------|----------------------|-------------------|------------|----------------------------------|-------------|------------|
|                            | Main Effect of Group |              |            | Main Effect of Noise |                   |            | Noise $\times$ Group Interaction |             |            |
|                            | $F(1, 17)$           | $p$          | $\eta_p^2$ | $F(1, 17)$           | $p$               | $\eta_p^2$ | $F(1, 17)$                       | $p$         | $\eta_p^2$ |
| P1 Amplitude (in $\mu V$ ) | 7.292                | <b>.015</b>  | .300       | 21.872               | <b>.0002</b>      | .563       | 0.055                            | .818        | .003       |
| N2 Amplitude (in $\mu V$ ) | 20.035               | <b>.0003</b> | .541       | 7.864                | <b>.012</b>       | .316       | 0.217                            | .647        | .013       |
| P1 Latency (in ms)         | 1.748                | .204         | .093       | 77.846               | <b>&lt; .0001</b> | .821       | 8.347                            | <b>.010</b> | .329       |
| N2 Latency (in ms)         | 0.010                | .923         | .001       | 67.802               | <b>&lt; .0001</b> | .800       | 0.235                            | .634        | .014       |

*Note.*  $F$  value =  $F$ -statistics with degrees of freedom in parenthesis;  $p$  = level of significance;  $\eta_p^2$ : Partial eta squared, the effect size.
