# Supplementary material
Source: publisher figshare collection journal article supplement (https://asha.figshare.com/articles/dataset/_/21357735)
Supplement: Supplementary file 6 [file 1]

**Supplemental Material S6.** Mean, standard deviation, median and statistical test (independent *t* test) results of the ALLR measures.

| EP Measures              | In quiet |           |            |          |           |            |                 |                 |
|--------------------------|----------|-----------|------------|----------|-----------|------------|-----------------|-----------------|
|                          | APD      |           |            | TD       |           |            | <i>t</i> -value | <i>p</i> -value |
|                          | <i>M</i> | <i>SD</i> | <i>Mdn</i> | <i>M</i> | <i>SD</i> | <i>Mdn</i> | <i>t</i> (17)   |                 |
| P1 Amplitude (in μV)     | 4.46     | 1.98      | 4.12       | 2.97     | 1.42      | 2.61       | −1.860          | .080            |
| N2 Amplitude (in μV)     | −5.67    | 2.21      | −5.21      | −2.91    | 1.19      | 3.25       | 3.332           | <b>.004</b>     |
| P1 Latency (in ms)       | 107.80   | 4.49      | 108.00     | 115.70   | 27.77     | 108        | 0.862           | .401            |
| N2 Latency (in ms)       | 318.20   | 11.98     | 319.00     | 320.11   | 18.67     | 315.00     | 0.268           | .792            |
| In the presence of noise |          |           |            |          |           |            |                 |                 |
|                          | APD      |           |            | TD       |           |            | <i>t</i> -value | <i>p</i> -value |
|                          | <i>M</i> | <i>SD</i> | <i>Mdn</i> | <i>M</i> | <i>SD</i> | <i>Mdn</i> | <i>t</i> (17)   |                 |
| P1 Amplitude (in μV)     | 2.93     | 1.36      | 2.58       | 1.28     | 0.80      | 1.13       | −3.162          | <b>.006</b>     |
| N2 Amplitude (in μV)     | −4.41    | 1.30      | −4.51      | −2.01    | 0.92      | −2.16      | 4.600           | <b>.0002</b>    |
| P1 Latency (in ms)       | 177.10   | 15.61     | 172.00     | 150.88   | 22.90     | 151.00     | −2.942          | <b>.009</b>     |
| N2 Latency (in ms)       | 364.70   | 17.96     | 362.00     | 361.44   | 25.42     | 375.00     | −0.325          | .749            |

*Note.* *F* value = *F*-statistics with degrees of freedom in parenthesis; *p* = level of significance.
