# Supplementary material
Source: publisher figshare collection journal article supplement (https://asha.figshare.com/articles/dataset/_/21357735)
Supplement: Supplementary file 7 [file 1]

**Supplemental Material S3.** Mean, standard deviation, median, and statistical test (independent *t* test) results of FFR measures in quiet.

| FFR Measures               | In quiet |           |            |          |           |            |                                  | <i>p</i> -value |
|----------------------------|----------|-----------|------------|----------|-----------|------------|----------------------------------|-----------------|
|                            | APD      |           |            | TD       |           |            | <i>t</i> -value<br><i>t</i> (17) |                 |
|                            | <i>M</i> | <i>SD</i> | <i>Mdn</i> | <i>M</i> | <i>SD</i> | <i>Mdn</i> |                                  |                 |
| P1 Amplitude (in μV)       | 0.147    | 0.098     | 0.125      | 0.147    | 0.105     | 0.093      | −0.009                           | .993            |
| P2 Amplitude (in μV)       | −0.124   | 0.086     | −0.112     | −0.262   | 0.189     | −0.220     | −2.087                           | .052            |
| P3 Amplitude (in μV)       | 0.142    | 0.092     | 0.146      | 0.377    | 0.364     | 0.147      | 1.977                            | .065            |
| P4 Amplitude (in μV)       | −0.133   | 0.100     | −0.106     | −0.429   | 0.379     | −0.195     | −2.386                           | <b>.029</b>     |
| P5 Amplitude (in μV)       | 0.118    | 0.089     | 0.105      | 0.455    | 0.373     | 0.368      | 2.776                            | <b>.013</b>     |
| P6 Amplitude (in μV)       | −0.109   | 0.083     | −0.078     | −0.385   | 0.259     | −0.385     | −3.194                           | <b>.005</b>     |
| P7 Amplitude (in μV)       | 0.103    | 0.059     | 0.102      | 0.309    | 0.164     | 0.274      | 3.730                            | <b>.002</b>     |
| P8 Amplitude (in μV)       | −0.124   | 0.081     | −0.122     | −0.214   | 0.154     | −0.159     | −1.628                           | .122            |
| P9 Amplitude (in μV)       | 0.114    | 0.076     | 0.099      | 0.200    | 0.115     | 0.208      | 1.958                            | .067            |
| P10 Amplitude (in μV)      | −0.078   | 0.041     | −0.068     | −0.169   | 0.102     | −0.134     | −2.632                           | <b>.017</b>     |
| P1 Latency (in ms)         | 54.7     | 1.24      | 54.35      | 54.67    | 2.95      | 54.0       | −0.033                           | .974            |
| P2 Latency (in ms)         | 58.24    | 1.60      | 58.35      | 59.11    | 3.55      | 59.3       | 0.702                            | .492            |
| P3 Latency (in ms)         | 62.73    | 1.41      | 62.15      | 63.84    | 3.22      | 62.0       | 0.997                            | .333            |
| P4 Latency (in ms)         | 67.16    | 1.27      | 67.35      | 68.27    | 3.69      | 67.7       | 0.893                            | .384            |
| P5 Latency (in ms)         | 72.42    | 2.72      | 71.45      | 72.46    | 4.26      | 72.3       | 0.022                            | .983            |
| P6 Latency (in ms)         | 76.25    | 2.45      | 75.35      | 77.23    | 3.91      | 77.0       | 0.664                            | .515            |
| P7 Latency (in ms)         | 80.43    | 2.67      | 79.20      | 81.06    | 3.96      | 80.0       | 0.407                            | .689            |
| P8 Latency (in ms)         | 85.95    | 2.83      | 85.0       | 85.42    | 3.51      | 85.0       | −0.363                           | .721            |
| P9 Latency (in ms)         | 90.53    | 3.57      | 90.15      | 90.67    | 4.56      | 89.0       | 0.074                            | .942            |
| P10 Latency (in ms)        | 94.95    | 3.92      | 94.95      | 94.70    | 4.47      | 94.0       | 0.130                            | .898            |
| Stim-to-resp correlation   | 0.252    | 0.130     | 0.215      | 0.431    | 0.137     | 0.48       | 2.977                            | <b>.008</b>     |
| Stim-to-resp lag (in ms)   | 11.16    | 0.839     | 11.20      | 10.96    | 1.68      | 11.60      | −0.341                           | .737            |
| F0 Amplitude (in μV)       | 0.0185   | 0.012     | 0.0159     | 0.0599   | 0.038     | 0.0504     | 3.176                            | <b>.006</b>     |
| F1 Amplitude (in μV)       | 0.0035   | 0.002     | 0.0032     | 0.0044   | 0.0018    | 0.0037     | 0.947                            | .357            |
| F2 Amplitude (in μV)       | 0.00084  | 0.0003    | 0.00084    | 0.00151  | 0.00073   | 0.00151    | 2.507                            | <b>.023</b>     |
| Quiet to noise correlation | 0.095    | 0.066     | 0.095      | 0.218    | 0.116     | 0.150      | 2.846                            | <b>.011</b>     |

*Note.* Pearson's coefficient = *r* value mentioned for all correlation measures; stim-to-resp = stimulus-to-response; TD = typically developing children; APD = auditory processing disorder; *t*-value = *t*-statistics with degrees of freedom in parenthesis; *p* = level of significance.
